# Supplementary material for: Dynamics of anti-SARS-CoV-2 seroconversion in individual patients and at the population level
Source: bioRxiv or medRxiv preprint supplement (doi:10.1101/2022.03.20.22272651), 2022-03-23
Supplement: Supplementary file [file media-1.pdf]

**Supplementary material**

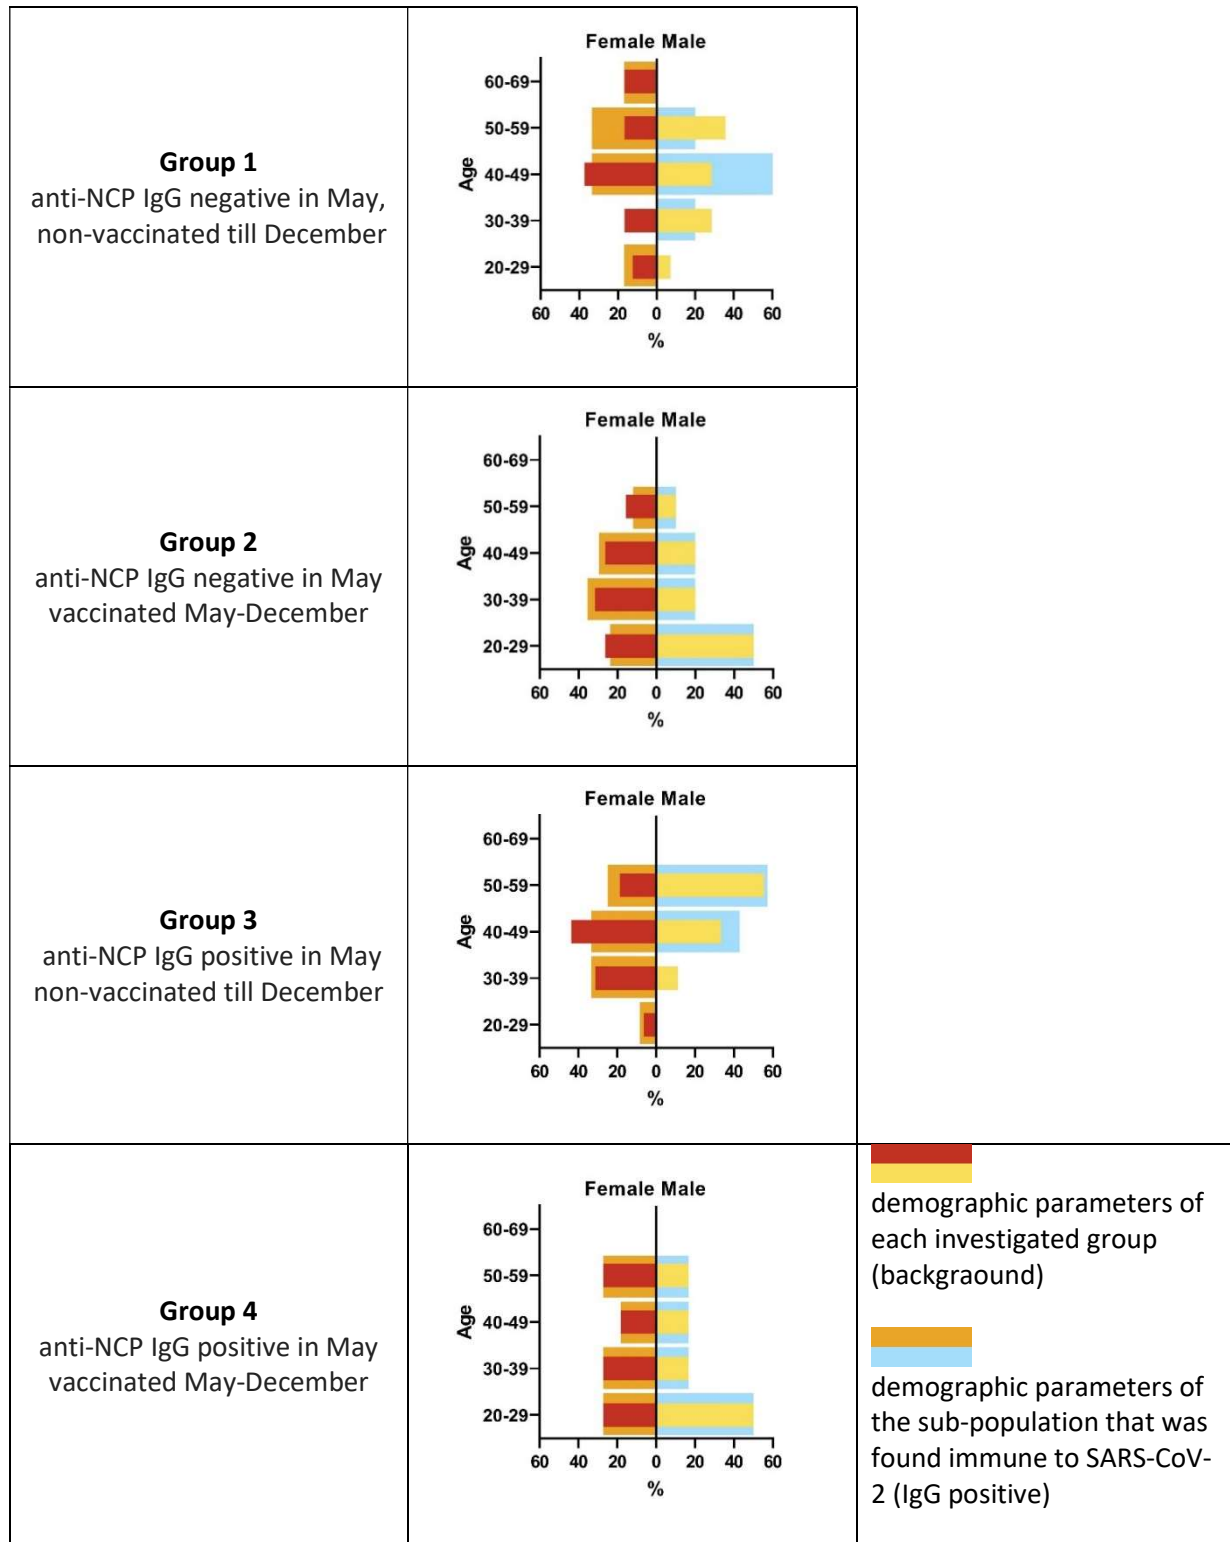

**Supplementary Figure S1.** Demographics in the serological screening of population without registered SARS-CoV-2 infections: demographic parameters of participants found positive for anti-SARS-CoV-2 IgG in each investigated group compared to general demographic parameters of the group. Antibodies were identified in blood samples after separation of blood sera by clotting and centrifugation. Microblot-array testing was applied to determine IgG level in each participants and positive/negative result was qualified according to the validated test.

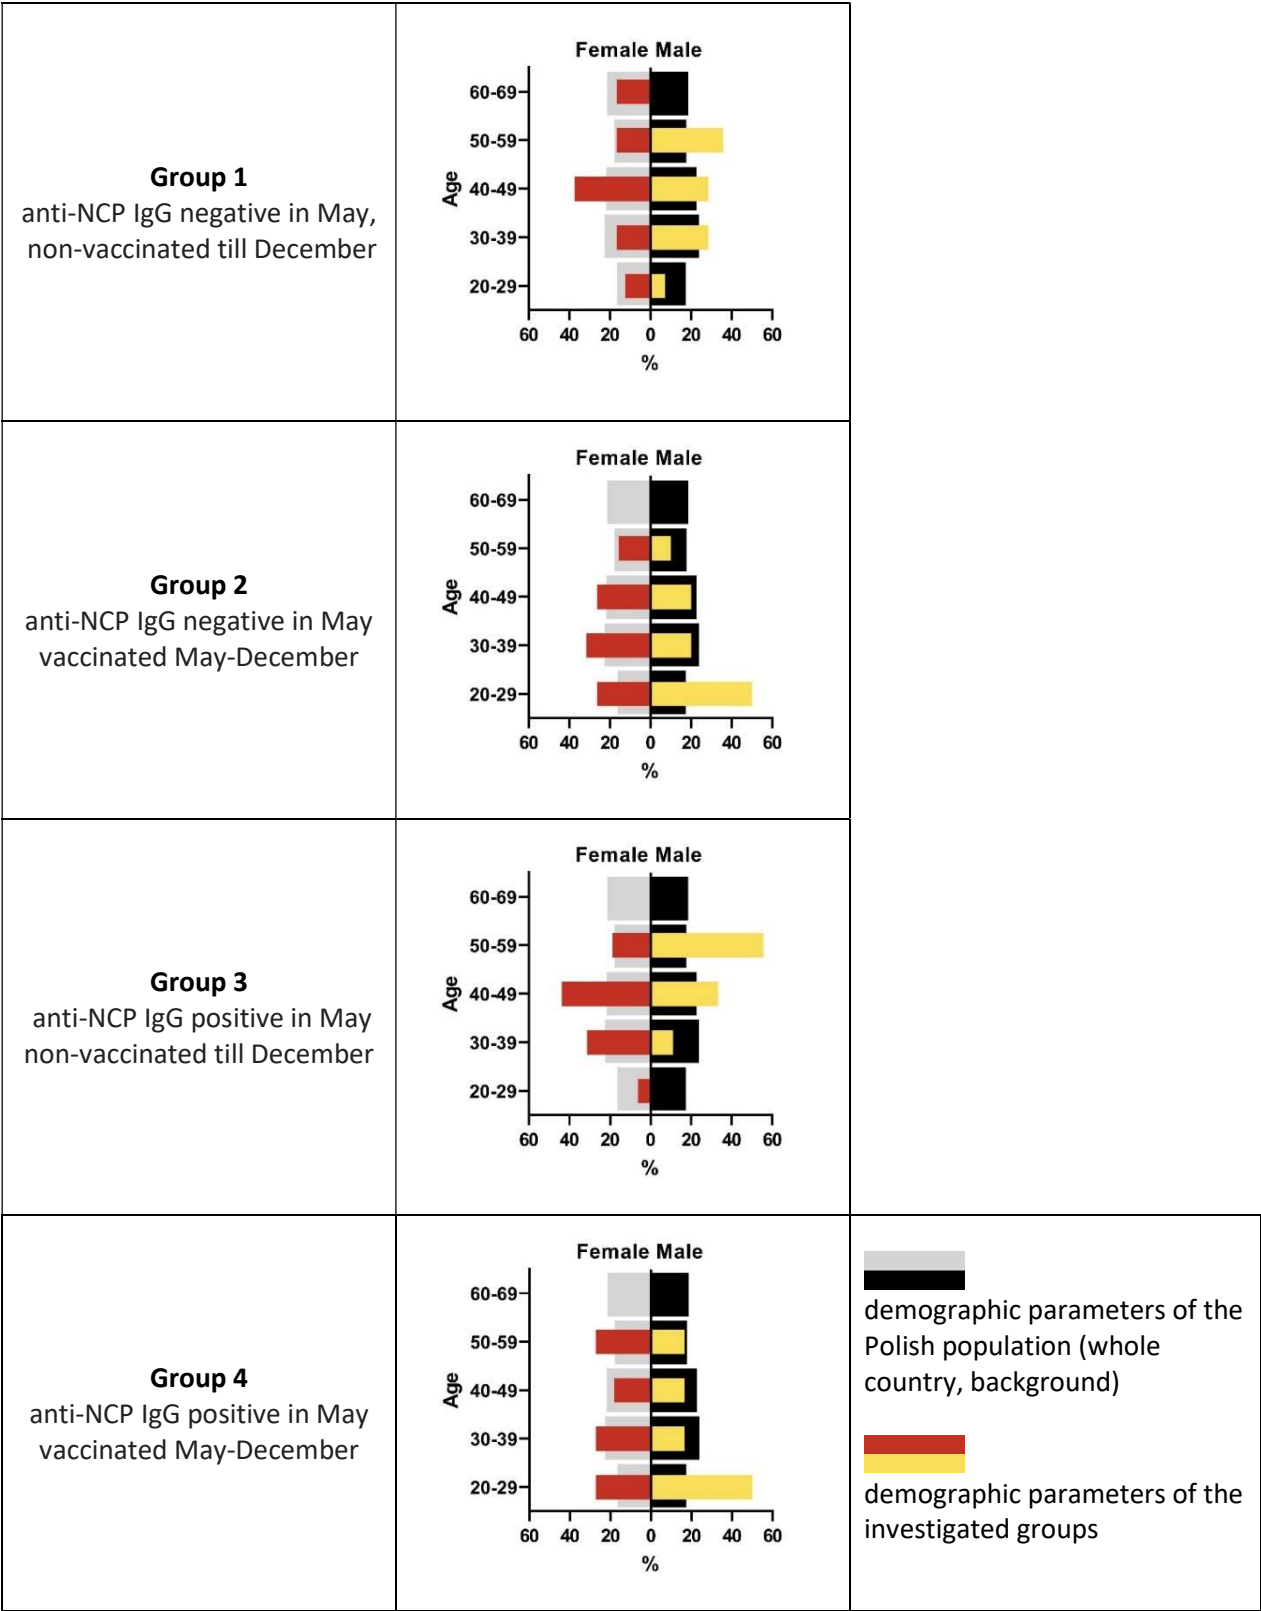

**Supplementary Figure S2.** Demographics in the serological screening of population without registered SARS-CoV-2 infections: demographic parameters of each investigated group compared to general demographic parameters of the whole country.

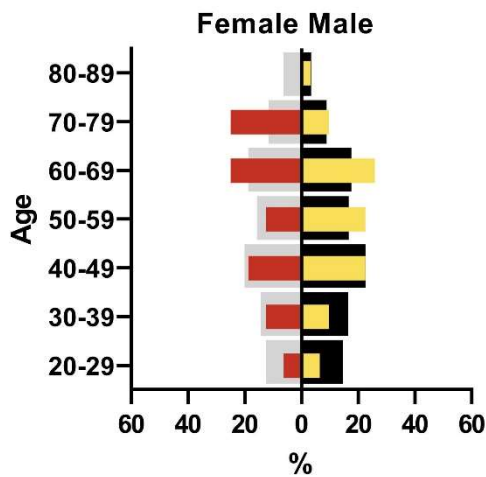

- demographic parameters of the Patients hospitalized due to COVID-19
- demographic parameters of the Polish population (general)

**Supplementary Figure S3.** Demographics in patients hospitalized due to COVID-19

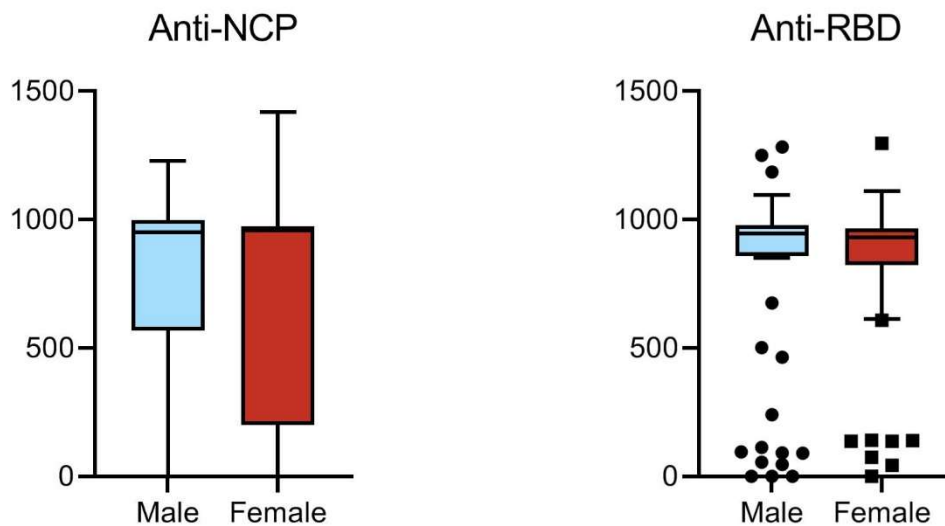

**Supplementary Figure S4.** IgG specific to SARS-CoV-2 in non-vaccinated patients hospitalized due to COVID-19: female and male comparison. Anti-NCP- antibodies specific to nucleocapsid protein N, anti-RBD- antibodies specific to receptor binding domain within spike protein S1 region. Antibodies were identified in blood samples after separation of blood sera by clotting and centrifugation. Microblot-array testing was applied to determine IgG level (U/ml). Median values are presented (dash), with quartiles 1 and 3 (boxes), and minimum/maximum values (whiskers);  $p > 0.05$  by Welsh test

**Supplementary Table S1.** Distributions of quantitative variables of measurements for IgG specific to SARS-CoV-2 NCP and RBD in: Group 1: anti-NCP IgG negative, non-vaccinated; Group 2: anti-NCP IgG negative, vaccinated; Group 3: anti-NCP IgG positive, non-vaccinated; Group 4: anti-NCP IgG positive, vaccinated. NCP – nucleocapsid protein, RBD – receptor binding protein

| Group | Antibody | Date of the study | N  | Min   | Q25%   | Median | Q75%  | Max   | Range | Average |
|-------|----------|-------------------|----|-------|--------|--------|-------|-------|-------|---------|
| 1     | NCP      | May               | 38 | 0     | 0      | 5.211  | 17.27 | 107.3 | 107.3 | 13.11   |
|       |          | December          | 38 | 0     | 13.82  | 20.96  | 416.5 | 986.2 | 986.2 | 219     |
|       | RBD      | May               | 38 | 0     | 0      | 0.691  | 6.769 | 120   | 120   | 6.172   |
|       |          | December          | 38 | 19.77 | 38.09  | 58.61  | 278.8 | 976.7 | 956.9 | 207.6   |
| 2     | NCP      | May               | 29 | 0     | 0.0605 | 8.425  | 39.6  | 170.7 | 170.7 | 27.53   |
|       |          | December          | 29 | 5.701 | 14.55  | 21.6   | 26.16 | 400   | 394.3 | 51.78   |
|       | RBD      | May               | 29 | 0     | 0      | 0.398  | 7.759 | 64.88 | 64.88 | 7.461   |
|       |          | December          | 29 | 59.99 | 457.1  | 809.6  | 943.7 | 987.2 | 927.2 | 696.6   |
| 3     | NCP      | May               | 25 | 317   | 752    | 929    | 989.9 | 1343  | 1026  | 844.6   |
|       |          | December          | 25 | 0     | 41.91  | 158.6  | 265.1 | 818.9 | 818.9 | 196.7   |
|       | RBD      | May               | 25 | 11.73 | 305.2  | 922.5  | 982.9 | 1221  | 1209  | 683.2   |
|       |          | December          | 25 | 5.202 | 112    | 202.7  | 492.1 | 935.5 | 930.3 | 308.9   |
| 4     | NCP      | May               | 17 | 238.1 | 553.9  | 862.1  | 969.6 | 1279  | 1041  | 774     |
|       |          | December          | 17 | 19.61 | 35.1   | 91.53  | 133.6 | 476.9 | 457.2 | 118.8   |
|       | RBD      | May               | 17 | 0     | 220.4  | 558.4  | 805.3 | 1221  | 1221  | 518.5   |
|       |          | December          | 17 | 461.5 | 759    | 941.6  | 972.9 | 988.5 | 527   | 862     |

Results are given as U/ml. Q25% and Q75% - 1. and 3. Quantile.

**Supplementary Table S2.** Distributions of quantitative variables – IgG specific to SARS-CoV-2 NCP, RBD and Spike S2 in: non-vaccinated patients hospitalized due to COVID-19 and vaccinated control group

|                       |     | N  | Min   | Q25%  | Median | Q75%  | Max   | Average |
|-----------------------|-----|----|-------|-------|--------|-------|-------|---------|
| non-vaccinated        | NP  | 95 | 0     | 469.3 | 957.1  | 988   | 1418  | 755.1   |
|                       | RBD | 95 | 0     | 830   | 940.4  | 972.5 | 1297  | 790.9   |
| male non-vaccinated   | NP  | 56 | 0     | 567   | 950.3  | 999.5 | 1229  | 776.3   |
|                       | RBD | 56 | 0     | 858.5 | 946    | 978.9 | 1283  | 797.1   |
| female non-vaccinated | NP  | 40 | 0     | 200.9 | 957.7  | 974.5 | 1418  | 729.8   |
|                       | RBD | 40 | 0     | 823.2 | 932.1  | 965.2 | 1297  | 786.7   |
| Mild anti-NCP         | D5  | 5  | 0     | 4.527 | 42.87  | 565.9 | 944.1 | 236.7   |
|                       | D10 | 11 | 0     | 3.067 | 483.3  | 957.2 | 964   | 474.6   |
|                       | D15 | 17 | 16.64 | 189.1 | 942.9  | 971.5 | 1229  | 657.8   |
|                       | D30 | 6  | 773.3 | 786   | 918.8  | 969.2 | 1002  | 893.5   |
|                       | D90 | 2  | 988   | 988   | 988.1  | 988.1 | 988.1 | 988.1   |
| Moderate anti-NCP     | D10 | 4  | 850.4 | 877.3 | 961.3  | 967.7 | 968.7 | 935.4   |
|                       | D15 | 12 | 469.3 | 972.8 | 980.8  | 1018  | 1418  | 994.9   |
|                       | D30 | 8  | 950.2 | 974.2 | 1002   | 1057  | 1182  | 1022    |
|                       | D90 | 7  | 817.9 | 950.5 | 966.4  | 988.5 | 988.7 | 952.1   |

|                   |     |    |       |       |       |       |       |       |
|-------------------|-----|----|-------|-------|-------|-------|-------|-------|
| Severe anti-NCP   | D10 | 5  | 0     | 0     | 58.18 | 693.2 | 945.1 | 288.9 |
|                   | D15 | 7  | 33.99 | 65.59 | 841.3 | 1066  | 1102  | 698.2 |
|                   | D30 | 4  | 1002  | 1004  | 1059  | 1145  | 1157  | 1069  |
|                   | D90 | 4  | 868.8 | 881.4 | 941.1 | 981.2 | 987.2 | 934.6 |
| Mild anti-RBD     | D5  | 5  | 47.38 | 69.21 | 140.2 | 927.1 | 944.1 | 426.6 |
|                   | D10 | 11 | 0     | 96.13 | 501.9 | 957.2 | 964   | 516.9 |
|                   | D15 | 17 | 0     | 610.1 | 930.1 | 952.2 | 1283  | 771.3 |
|                   | D30 | 6  | 883.7 | 903.9 | 940.4 | 988.6 | 1004  | 943.8 |
|                   | D90 | 2  | 970.6 | 970.6 | 973.8 | 976.9 | 976.9 | 973.8 |
| Moderate anti-RBD | D10 | 4  | 830   | 835.1 | 878.3 | 954.1 | 970.1 | 889.2 |
|                   | D15 | 12 | 675.2 | 916.8 | 963.9 | 1015  | 1297  | 966.7 |
|                   | D30 | 8  | 882.9 | 932.2 | 1005  | 1056  | 1112  | 999.8 |
|                   | D90 | 7  | 915.3 | 944.6 | 959   | 977.6 | 988.7 | 957.9 |
| Severe Anti-RBD   | D10 | 5  | 0     | 27.71 | 138.9 | 718.7 | 972.5 | 326.3 |
|                   | D15 | 7  | 0     | 92.36 | 936.4 | 1186  | 1250  | 760.6 |
|                   | D30 | 4  | 1002  | 1002  | 1013  | 1078  | 1096  | 1031  |
|                   | D90 | 4  | 906.8 | 909.3 | 940.2 | 967.3 | 968.6 | 938.9 |

Results are given as U/ml. Q25% and Q75% - 1. and 3. Quantile. Day 5.10.15.30.90 from the onset of the infection.

**Supplementary Table S3.** Number and percentage of smokers and allergies in studied groups.

|         | Group 1<br>(N=38)<br>negative for anti-<br>NCP IgG<br>in May.<br>non-vaccinated | Group 2<br>(N=29)<br>negative for anti-<br>NCP IgG<br>in May.<br>vaccinated | Group 3<br>(N=25)<br>positive for anti-<br>NCP IgG<br>in May.<br>non-vaccinated | Group 4<br>(N=17)<br>positive for anti-<br>NCP IgG<br>in May.<br>vaccinated |
|---------|---------------------------------------------------------------------------------|-----------------------------------------------------------------------------|---------------------------------------------------------------------------------|-----------------------------------------------------------------------------|
| Allergy | 11 (29%)                                                                        | 7 (24%)                                                                     | 4 (16%)                                                                         | 6 (35%)                                                                     |
| Smokers | 11 (29%)                                                                        | 7 (24%)                                                                     | 8 (32%)                                                                         | 3 (18%)                                                                     |

**Supplementary Table S4.** Distribution of BMI index in the study groups

|                                                                 | Min   | Q1    | Media<br>n | Q3    | Max   | Mean  | Std.<br>Deviation | Std.<br>Error of<br>Mean |
|-----------------------------------------------------------------|-------|-------|------------|-------|-------|-------|-------------------|--------------------------|
| Group 1 (N=38) negative for anti-NCP IgG in May. non-vaccinated | 19.05 | 21.92 | 25.57      | 29.36 | 35.32 | 25.84 | 4.58              | 0.74                     |
| Group 2 (N=29) negative for anti-NCP IgG in May. vaccinated     | 17.1  | 21.81 | 23.83      | 28.36 | 33.79 | 24.79 | 4.56              | 0.85                     |
| Group 3 (N=25) positive for anti-NCP IgG in May. non-vaccinated | 20.29 | 22.81 | 27.77      | 30.2  | 35.16 | 27.05 | 4.59              | 0.92                     |

|                                                             |       |       |       |       |       |       |      |      |
|-------------------------------------------------------------|-------|-------|-------|-------|-------|-------|------|------|
| Group 4 (N=17) positive for anti-NCP IgG in May. vaccinated | 17.36 | 20.24 | 23.53 | 28.42 | 38.58 | 24.74 | 5.53 | 1.34 |
| Q25% and Q75% - 1. and 3. Quantile                          |       |       |       |       |       |       |      |      |

**Supplementary Table S5.** T-test between each time point sample for anti-RBD IgG titres. P-values obtained for each set of groups were adjusted for multiple hypothesis.

| Anti-RBD |       |                   |                   |                             |                             |
|----------|-------|-------------------|-------------------|-----------------------------|-----------------------------|
| Mild     | D5    | D10               | D15               | D30                         | D90                         |
| D5       | -     | > 0.1             | > 0.1             | > 0.1                       | > 0.1                       |
| D10      | > 0.1 | -                 | <b>&lt; 0.01</b>  | <b>&lt; 0.05</b>            | <b>&lt; 0.05</b>            |
| D15      | > 0.1 | <b>&lt; 0.01</b>  | -                 | > 0.1                       | > 0.1                       |
| D30      | > 0.1 | <b>&lt; 0.05</b>  | > 0.1             | -                           | > 0.1                       |
| D90      | > 0.1 | <b>&lt; 0.05</b>  | > 0.1             | > 0.1                       | -                           |
|          |       |                   |                   |                             |                             |
| Moderate | D5    | D10               | D15               | D30                         | D90                         |
| D5       | -     | -                 | -                 | -                           | -                           |
| D10      | -     | -                 | <b>&lt; 0.001</b> | <b>&lt; 0.05</b>            | > 0.1                       |
| D15      | -     | <b>&lt; 0.001</b> | -                 | > 0.1                       | > 0.1                       |
| D30      | -     | <b>&lt; 0.05</b>  | > 0.1             | -                           | > 0.1                       |
| D90      | -     | > 0.1             | > 0.1             | > 0.1                       | -                           |
|          |       |                   |                   |                             |                             |
| Severe   | D5    | D10               | D15               | D30                         | D90                         |
| D10      | > 0.1 | -                 | > 0.1             | <b>&lt; 0.05</b>            | > 0.1                       |
| D15      | > 0.1 | > 0.1             | -                 | > 0.1                       | > 0.1                       |
| D30      | > 0.1 | <b>&lt; 0.05</b>  | > 0.1             | -                           | <b>0.1 &gt; p &gt; 0.05</b> |
| D90      | > 0.1 | > 0.1             | > 0.1             | <b>0.1 &gt; p &gt; 0.05</b> | -                           |

**Supplementary Table S6.** T-test between each time point sample for anti-NCP IgG titres.

| Anti -NCP |                             |                             |       |                             |                             |
|-----------|-----------------------------|-----------------------------|-------|-----------------------------|-----------------------------|
| Mild      | D5                          | D10                         | D15   | D30                         | D90                         |
| D5        | -                           | > 0.1                       | > 0.1 | <b>0.1 &gt; p &gt; 0.05</b> | > 0.1                       |
| D10       | > 0.1                       | -                           | > 0.1 | <b>0.1 &gt; p &gt; 0.05</b> | <b>0.1 &gt; p &gt; 0.05</b> |
| D15       | > 0.1                       | > 0.1                       | -     | > 0.1                       | > 0.1                       |
| D30       | <b>0.1 &gt; p &gt; 0.05</b> | <b>0.1 &gt; p &gt; 0.05</b> | > 0.1 | -                           | > 0.1                       |
| D90       | > 0.1                       | <b>0.1 &gt; p &gt; 0.05</b> | > 0.1 | > 0.1                       | -                           |
|           |                             |                             |       |                             |                             |
| Moderate  | D5                          | D10                         | D15   | D30                         | D90                         |
| D5        | -                           | -                           | -     | -                           | -                           |
| D10       | -                           | -                           | > 0.1 | > 0.1                       | > 0.1                       |

|        |                             |                             |       |                             |        |
|--------|-----------------------------|-----------------------------|-------|-----------------------------|--------|
| D15    | -                           | > 0.1                       | -     | > 0.1                       | > 0.1  |
| D30    | -                           | > 0.1                       | > 0.1 | -                           | < 0.05 |
| D90    | -                           | > 0.1                       | > 0.1 | < 0.05                      | -      |
|        |                             |                             |       |                             |        |
| Severe | D5                          | D10                         | D15   | D30                         | D90    |
| D10    | <b>0.1 &gt; p &gt; 0.05</b> | -                           | > 0.1 | <b>0.1 &gt; p &gt; 0.05</b> | > 0.1  |
| D15    | > 0.1                       | > 0.1                       | -     | > 0.1                       | > 0.1  |
| D30    | > 0.1                       | <b>0.1 &gt; p &gt; 0.05</b> | > 0.1 | -                           | < 0.05 |
| D90    | > 0.1                       | > 0.1                       | > 0.1 | < 0.05                      | -      |
